# Supplementary material for: Comparison of nutritional composition between plant-based drinks and cow’s milk
Source: PubMed Central journal article supplement (PMC9650290; doi:10.3389/fnut.2022.988707), 2022-10-28
Supplement: Table_4.pdf [file Table_4.pdf]

**Table S4.** Calculated mean DIAAS and predicted first-limiting amino acids for the different plant-based drinks and cow's milk for different reference patterns.

| Product       |   | Reference Pattern           |           |                                |           |                                        |           |
|---------------|---|-----------------------------|-----------|--------------------------------|-----------|----------------------------------------|-----------|
|               |   | Infants (birth to 6 months) |           | Children (6 months to 3 years) |           | Older children, adolescents and adults |           |
|               |   | N                           | DIAAS (%) | 1 <sup>st</sup> Lim eAA        | DIAAS (%) | 1 <sup>st</sup> Lim eAA                | DIAAS (%) |
| Almond Drink  | 4 | 27.1                        | Lys       | 32.9                           | Lys       | 39.0                                   | Lys       |
| Cashew Drink  | 2 | 51.2                        | Ile       | 66.4                           | Lys       | 78.8                                   | Lys       |
| Coconut Drink | 3 | 39.1                        | TRP       | 62.8                           | Lys       | 71.9                                   | Ile       |
| Cow's milk    | 2 | 65.4                        | TRP       | 123.5                          | SAA       | 145.0                                  | SAA       |
| Hemp Drink    | 1 | 38.4                        | Lys       | 46.5                           | Lys       | 55.2                                   | Lys       |
| Oat Drink     | 4 | 41.1                        | Lys       | 49.8                           | Lys       | 59.1                                   | Lys       |
| Rice Drink    | 5 | 30.0                        | Lys       | 36.3                           | Lys       | 43.1                                   | Lys       |
| Soy Drink     | 7 | 71.2                        | TRP       | 91.9                           | SAA       | 107.6                                  | Val       |
| Spelt Drink   | 1 | 28.5                        | Lys       | 34.5                           | Lys       | 41.0                                   | Lys       |

DIAAS: Digestible Indispensable Amino Acid Score, 1st Lim eAA: first limiting essential amino acid, Ile: isoleucine, Lys: lysin, Leu: leucin, TRP: Tryptophan, Val: valin, SAA: sulphur amino acid
